# Supplementary material
Source: PubMed Central journal article supplement (PMC8493794)
Supplement: NIHMS1717333-supplement-Supplemental_Material.pdf [file NIHMS1717333-supplement-Supplemental_Material.pdf]

## Supplemental Materials

*Table S1. Descriptive statistics by treatment assignment at the three assessment time points for maternal depression symptoms, anxiety symptoms, and support services received*

|                                                     | Baseline                  |               |                              |               | Infant age 6 months       |               |                              |               | Infant age 12 months      |               |                              |               |
|-----------------------------------------------------|---------------------------|---------------|------------------------------|---------------|---------------------------|---------------|------------------------------|---------------|---------------------------|---------------|------------------------------|---------------|
|                                                     | Control<br><i>n</i> = 125 |               | <i>PFR</i><br><i>n</i> = 127 |               | Control<br><i>n</i> = 122 |               | <i>PFR</i><br><i>n</i> = 122 |               | Control<br><i>n</i> = 123 |               | <i>PFR</i><br><i>n</i> = 120 |               |
|                                                     | <i>M</i>                  | ( <i>SD</i> ) | <i>M</i>                     | ( <i>SD</i> ) | <i>M</i>                  | ( <i>SD</i> ) | <i>M</i>                     | ( <i>SD</i> ) | <i>M</i>                  | ( <i>SD</i> ) | <i>M</i>                     | ( <i>SD</i> ) |
| <i>Maternal mental health</i>                       |                           |               |                              |               |                           |               |                              |               |                           |               |                              |               |
| Depression symptoms                                 | 5.83                      | (4.75)        | 5.59                         | (4.74)        | 5.96                      | (5.39)        | 5.41                         | (4.28)        | 6.26                      | (5.01)        | 5.31                         | (4.30)        |
| Anxiety symptoms                                    | 6.69                      | (5.39)        | 6.00                         | (5.10)        | 6.45                      | (5.20)        | 5.28                         | (4.21)        | 6.70                      | (5.23)        | 5.72                         | (4.77)        |
|                                                     | <i>n</i>                  | (%)           | <i>n</i>                     | (%)           | <i>n</i>                  | (%)           | <i>n</i>                     | (%)           | <i>n</i>                  | (%)           | <i>n</i>                     | (%)           |
| <i>Support services received</i>                    |                           |               |                              |               |                           |               |                              |               |                           |               |                              |               |
| Home visiting services                              | 60                        | (48.0)        | 57                           | (44.9)        | 24                        | (19.7)        | 21                           | (17.2)        | 19                        | (15.4)        | 16                           | (13.3)        |
| Mental health provider                              | 91                        | (72.8)        | 94                           | (74.6)        | 57                        | (46.7)        | 68                           | (55.7)        | 55                        | (44.7)        | 62                           | (51.7)        |
| Prescription medications for mental health concerns | 17                        | (13.6)        | 25                           | (20.0)        | 16                        | (13.1)        | 24                           | (19.7)        | 13                        | (10.7)        | 23                           | (19.2)        |

*Note.* *PFR* = Promoting First Relationships. Sample size is the maximum *n* at each time point. Depression symptoms were measured using the PHQ-9. Anxiety symptoms were measured using the GAD-7. Questions about services received were retrospective and included the following time periods: The baseline visit asked about services received from the time they were pregnant, the infant age 6 month visit asked about services received during the past 3 months, and the infant age 12 month visit asked about services received during the past 6 months. Home visiting services did not include *PFR*.
